# Supplementary material for: Toward personalized immunotherapy in sepsis: The PROVIDE randomized clinical trial
Source: PubMed Central journal article supplement — Cell Rep Med. 2022 Nov 15;3(11):100817. doi: 10.1016/j.xcrm.2022.100817 (PMC9729870; doi:10.1016/j.xcrm.2022.100817), 2022-11-15
Supplement: mmc1.pdf [file mmc1.pdf]

**Cell Reports Medicine, Volume 3**

## **Supplemental information**

### **Toward personalized immunotherapy in sepsis: The PROVIDE randomized clinical trial**

**Konstantinos Leventogiannis, Evdoxia Kyriazopoulou, Nikolaos Antonakos, Antigone Kotsaki, Iraklis Tsangaris, Dimitra Markopoulou, Inge Grondman, Nikoleta Rovina, Vassiliki Theodorou, Eleni Antoniadou, Ioannis Koutsodimitropoulos, George Dalekos, Glykeria Vlachogianni, Karolina Akinosoglou, Vassileios Koulouras, Apostolos Komnos, Theano Kontopoulou, Athanassios Prekates, Antonia Koutsoukou, Jos W.M. van der Meer, George Dimopoulos, Miltiades Kyprianou, Mihai G. Netea, and Evangelos J. Giamarellos-Bourboulis**

## **Towards personalized immunotherapy in sepsis: the PROVIDE randomized clinical trial**

### **Running title: PERSONALIZED IMMUNOTHERAPY IN SEPSIS**

Konstantinos Leventogiannis<sup>1\*</sup>, Evdoxia Kyriazopoulou<sup>1\*</sup>, Nikolaos Antonakos<sup>1\*</sup>, Antigone Kotsaki<sup>1\*</sup>, Iraklis Tsangaris<sup>2</sup>, Dimitra Markopoulou<sup>3</sup>, Inge Grondman<sup>4</sup>, Nikoleta Rovina<sup>5</sup>, Vassiliki Theodorou<sup>6</sup>, Eleni Antoniadou<sup>7</sup>, Ioannis Koutsodimitropoulos<sup>8</sup>, George Dalekos<sup>9</sup>, Glykeria Vlachogianni<sup>10</sup>, Karolina Akinosoglou<sup>11</sup>, Vassileios Koulouras<sup>12</sup>, Apostolos Komnos<sup>13</sup>, Theano Kontopoulou<sup>14</sup>, Athanassios Prekates<sup>15</sup>, Antonia Koutsoukou<sup>5</sup>, Jos W.M. van der Meer<sup>4</sup>, George Dimopoulos<sup>5</sup>, Miltiades Kyprianou<sup>1</sup>, Mihai G. Netea<sup>4,16</sup>, Evangelos J. Giamarellos-Bourboulis<sup>1</sup>

<sup>1</sup>4<sup>th</sup> Department of Internal Medicine, National and Kapodistrian University of Athens, Greece;

<sup>2</sup>2<sup>nd</sup> Department of Critical Care Medicine, National and Kapodistrian University of Athens, Greece;

<sup>3</sup>Intensive Care Unit, KAT Kiffisia General Hospital, Greece;

<sup>4</sup>Department of Internal Medicine and Radboud Center for Infectious Diseases, Radboud University Medical Center, Nijmegen, the Netherlands

<sup>5</sup>1<sup>st</sup> Department of Pulmonary Medicine, National and Kapodistrian University of Athens, Greece;

<sup>6</sup>Department of Critical Care Medicine, University of Thrace, Alexandroupolis, Greece;

<sup>7</sup>Intensive Care Unit, “G. Gennimatas” Thessaloniki General Hospital, Greece;

<sup>8</sup>Intensive Care Unit, Latseion Elefsis General Hospital, Greece;

<sup>9</sup>Department of Internal Medicine, Larissa University General Hospital, Greece;

<sup>10</sup>Intensive Care Unit, “Aghios Dimitrios” Thessaloniki General Hospital, Greece;

<sup>11</sup>Department of Internal Medicine, Patras University Hospital, Greece;

<sup>12</sup>Department of Critical Care Medicine, University of Ioannina, Greece;

<sup>13</sup>Intensive Care Unit, Larissa General Hospital, Greece;

<sup>14</sup>5<sup>th</sup> Department of Internal Medicine, Evangelismos Athens General Hospital, Greece;

<sup>15</sup>Intensive Care Unit, Tzaneion Piraeus General Hospital, Greece

<sup>16</sup>Department of Immunology and Metabolism, Life and Medical Sciences Institute (LIMES), University of Bonn, Germany

**Table S1 Multivariate Cox regression analysis of risk factors associated with 28-day mortality including colistin treatment as a co-variate Related to Figure 3.**

| Variable                            | Survival<br>N=95 | Death<br>N=145 | Univariate analysis<br>HR (95% CIs) | p-value | Multivariate analysis<br>HR (95% CIs) | p-value |
|-------------------------------------|------------------|----------------|-------------------------------------|---------|---------------------------------------|---------|
| Immune classification, n (%)        |                  |                |                                     |         |                                       |         |
| Intermediate state                  | 52 (54.7)        | 37 (25.5)      | 1 (Baseline HR)                     | -       | (Baseline HR)                         | -       |
| Immunoparalysis                     | 34 (35.8)        | 69 (47.6)      | 2.08 (1.39-3.10)                    | <0.0001 | 1.63 (1.08-2.42)                      | 0.019   |
| MALS                                | 9 (9.5)          | 39 (26.9)      | 3.37 (2.14-5.29)                    | <0.0001 | 2.25 (1.40-3.59)                      | <0.0001 |
| APACHE II score $\geq 27^*$ , n (%) | 24 (25.3)        | 69 (47.6)      | 2.14 (1.54-2.96)                    | <0.0001 | 1.55 (1.10-2.20)                      | 0.013   |
| SOFA score $\geq 8^*$ , n (%)       | 59 (62.1)        | 129 (89.0)     | 3.10 (1.67-5.07)                    | <0.0001 | **                                    |         |
| Chronic heart failure, n (%)        | 16 (16.8)        | 46 (31.7)      | 1.64 (1.16-2.33)                    | 0.006   | **                                    |         |
| Septic shock, n (%)                 | 54 (56.3)        | 123 (84.8)     | 2.65 (1.68-4.18)                    | <0.0001 | 2.03 (1.25-3.31)                      | 0.004   |
| Colistin treatment, n (%)           | 27 (31.0)        | 57 (40.4)      | 1.21 (0.87-1.70)                    | 0.256   | **                                    |         |

**Abbreviations** APACHE acute physiology and chronic health evaluation, CI: confidence interval; HR; hazard ratio; MALS: macrophage activation-like syndrome; n: number of patients; SOFA sequential organ failure assessment,

\*Values represent Youden Index of receiver operating characteristics curves for mortality

\*\*not entering the equation after two steps of forward analysis

**Table S2 Adverse events captured during the randomized clinical trial. Related to Figure 4**

|                                        | Placebo (n=21) | Personalized immunotherapy (n=15) | p-value* |
|----------------------------------------|----------------|-----------------------------------|----------|
| Incidence of at least one SAE**, n (%) | 4 (19.0)       | 4 (16.7)                          | 0.694    |
| Ventricular tachycardia                | 0 (0)          | 2 (13.3)                          | 0.167    |
| Digital ischemia                       | 0 (0)          | 2 (13.3)                          | 0.167    |
| Acute myocardial infarction            | 1 (4.8)        | 0 (0)                             | 1.00     |
| Brain tumor metastasis                 | 1 (4.8)        | 0 (0)                             | 1.00     |
| Obstructive ileus                      | 1 (4.8)        | 0 (0)                             | 1.00     |
| Pulmonary embolism                     | 1 (4.8)        | 0 (0)                             | 1.00     |
| At least one AE, n (%)                 | 2 (9.5)        | 0 (0)                             | 0.500    |
| Grade I hyperkalemia                   | 1 (4.8)        | 0 (0)                             | 1.00     |
| Grade III increase of $\gamma$ GT      | 1 (4.8)        | 0 (0)                             | 1.00     |

\*this does not include the number of deaths

\*\*by the Fisher exact test

Abbreviation AE: adverse event;  $\gamma$ GT: gamma glutmayl transpeptidase; SAE: serious adverse event

**Table S3. Definitions of eligible infections. Related to Methods details.**

| <b>Infection</b>               | <b>All the following</b>                                                                                                                                                                                                 | <b>At least 2 of the following</b>                                                                                                                                                                                      | <b>At least 1 of the following</b>                                                                                                                                                                                                                                               |
|--------------------------------|--------------------------------------------------------------------------------------------------------------------------------------------------------------------------------------------------------------------------|-------------------------------------------------------------------------------------------------------------------------------------------------------------------------------------------------------------------------|----------------------------------------------------------------------------------------------------------------------------------------------------------------------------------------------------------------------------------------------------------------------------------|
| Acute cholangitis              | <ul style="list-style-type: none"> <li>• Pain at the right upper quadrant</li> <li>• Fever (tympanic or oral temperature <math>\geq 38^{\circ}\text{C}</math>, rectal <math>\geq 38.3^{\circ}\text{C}</math>)</li> </ul> | None                                                                                                                                                                                                                    | Consistent ultrasound or CT findings                                                                                                                                                                                                                                             |
| Primary bacteremia             | <ul style="list-style-type: none"> <li>• At least 1 positive blood culture</li> <li>• Failure to identify a primary infection site despite thorough clinical and radiology investigation</li> </ul>                      | None                                                                                                                                                                                                                    | None                                                                                                                                                                                                                                                                             |
| Community-acquired Pneumonia   | New or evolving infiltrate on chest X-ray                                                                                                                                                                                | <ul style="list-style-type: none"> <li>• New onset or worsening of cough</li> <li>• Dyspnea</li> <li>• Auscultatory findings consistent with pulmonary consolidation</li> </ul>                                         | <ul style="list-style-type: none"> <li>• Procalcitonin <math>\geq 0.25</math> ng/ml</li> <li>• Hypoxemia (<math>\text{pO}_2 \leq 60</math> mmHg or oxygen saturation <math>\leq 90\%</math> in room air)</li> <li>• Respiratory rate <math>\geq 20</math> breaths/min</li> </ul> |
| Hospital-acquired pneumonia    | <ul style="list-style-type: none"> <li>• Onset <math>&gt;48</math> hours from hospital admission</li> <li>• New or evolving infiltrate on chest X-ray</li> </ul>                                                         | <ul style="list-style-type: none"> <li>• New onset or worsening of cough or dyspnea</li> <li>• Purulent tracheobronchial secretions</li> <li>• Auscultatory findings consistent with pulmonary consolidation</li> </ul> | <ul style="list-style-type: none"> <li>• Procalcitonin <math>\geq 0.25</math> ng/ml</li> <li>• Hypoxemia (<math>\text{pO}_2 \leq 60</math> mmHg or oxygen saturation <math>\leq 90\%</math> in room air)</li> <li>• Respiratory rate <math>\geq 20</math> breaths/min</li> </ul> |
| Ventilator-associate pneumonia | <ul style="list-style-type: none"> <li>• Onset <math>&gt;48</math> hours from start of mechanical ventilation</li> <li>• New or evolving infiltrate on chest X-ray</li> </ul>                                            | <ul style="list-style-type: none"> <li>• Purulent tracheobronchial secretions</li> <li>• Auscultatory findings consistent with pulmonary consolidation</li> </ul>                                                       | <ul style="list-style-type: none"> <li>• Procalcitonin <math>\geq 0.25</math> ng/ml</li> <li>• Clinical pulmonary infection score (CPIS) <math>\geq 6</math></li> </ul>                                                                                                          |

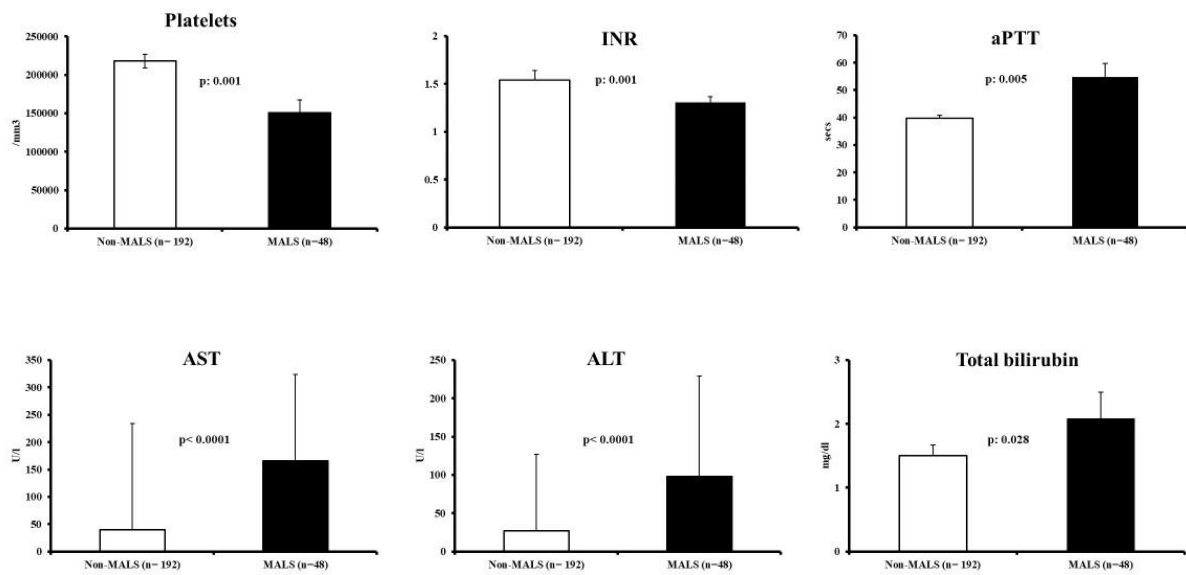

**Figure S1 Appropriateness of ferritin for the diagnosis of macrophage activation-like syndrome (MALS). Related to Figure 2**

Patients of the entire cohort are split into those with MALS as diagnosed with ferritin >4,420 ng/ml and into those without MALS as diagnosed with ferritin ≤4,420 ng/ml. Absolute platelet count (PLTs), international normalized ratio (INR), activated partial thromboplastin time (aPTT), aspartate aminotransferase (AST), alanine aminotransferase (ALT) and total bilirubin are significantly different between patients with and without MALS. The p-value of comparisons are provided.

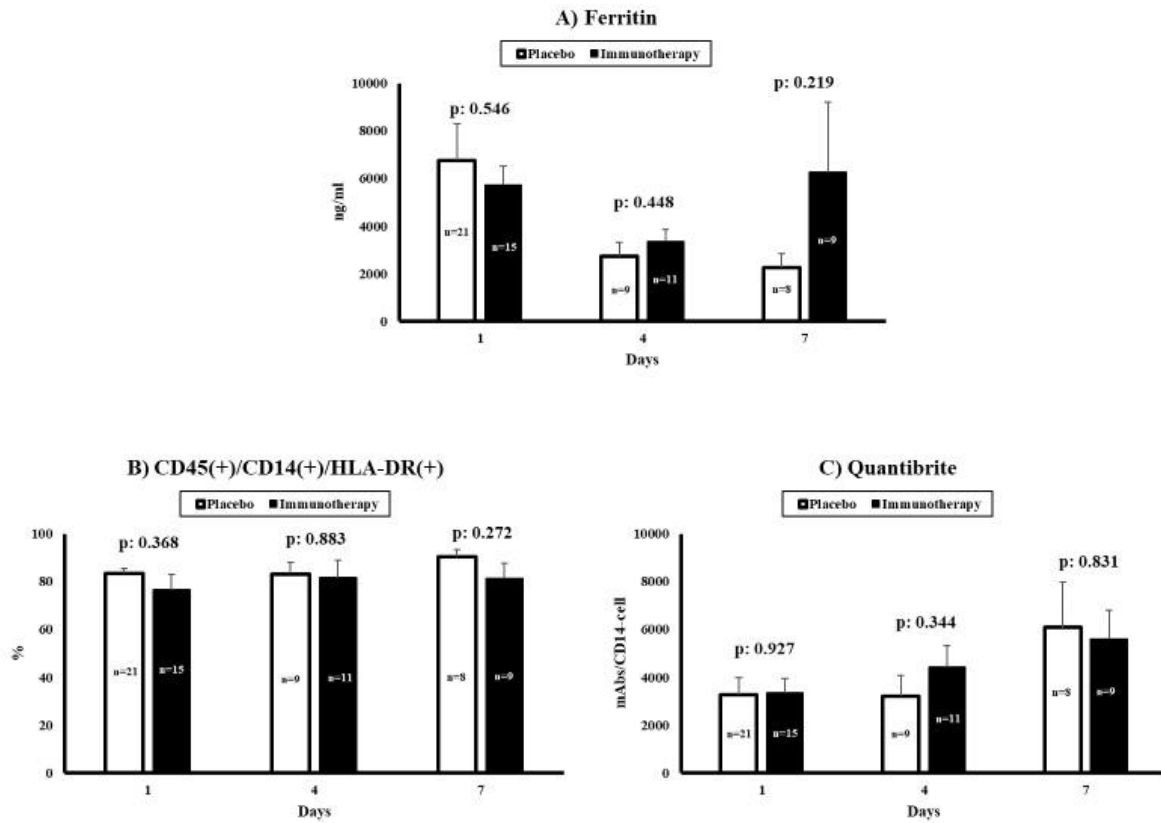

**Figure S2 Follow-up measurements of biomarkers for patients enrolled in the interventional trial. Related to Figure 4**

Circulating concentrations of ferritin (A), of the % expression of HLA-DR on circulating CD45(+)/CD14(+) monocytes (B) and of the absolute number of HLA-DR receptors on circulating CD45(+)/CD14(+) monocytes (Quantibrite) (C). P values indicate comparisons between patients allocated to the placebo arm and to the personalized immunotherapy arm. The number (n) of patients analyzed on each day of follow-up is also provided.
